# 1    **Physiological niche informs evolution of metabolic function** 2    **and corresponding drug targets of pathobionts**

3  
4    Emma M. Glass<sup>1</sup>, Lillian R. Dillard<sup>2</sup>, Andrew S. Warren<sup>3</sup>, Jason A. Papin<sup>1,2,4\*</sup>

5  
6    <sup>1</sup> Department of Biomedical Engineering

7    <sup>2</sup> Department of Biochemistry and Molecular Genetics

8    <sup>3</sup> Biocomplexity Institute and Initiative

9    <sup>4</sup> Division of Infectious Diseases & International Health, Department of Medicine

10    University of Virginia, Charlottesville, Virginia, USA

11    \* Corresponding Author

12

## 13    **ABSTRACT**

14    Pathogens pose a major risk to human health globally, causing 44% of deaths in low-resource  
15    countries. Currently, there are over 500 known bacterial pathobionts, covering a wide range of  
16    functional capabilities. Some well-known pathobionts are well characterized computationally and  
17    experimentally. However, to gain a deeper understanding of how pathobionts are evolutionarily  
18    related to the principles that govern their different functions and ultimately identify possible  
19    targeted antimicrobials, we must consider both well-known and lesser-known pathobionts. Here,  
20    we developed a database of genome-scale metabolic network reconstructions (GENREs) called  
21    PATHGENN, which contains 914 models of pathobiont metabolism to address these questions  
22    related to functional metabolic evolution and adaptation. We determined the metabolic  
23    phenotypes across all known pathobionts and the role of isolate environment in functional  
24    metabolic adaptation. We also predicted novel antimicrobial targets for bacteria specific to their  
25    physiological niche. Understanding the functional metabolic similarities between pathobionts is  
26    the first step to ultimately developing a precision medicine framework for addressing all infections.

27

## 28    **INTRODUCTION**

29    Bacterial pathogens pose a major risk to human health. Globally, pathogens are responsible for  
30    16% of all deaths, and responsible for 44% of deaths in low-resource countries<sup>1</sup>. Financially,  
31    global economic losses from pathogenic disease outbreaks amount to tens of billions of dollars in  
32    the past 10 years<sup>2</sup>. In recent years, there has been an increase in infectious disease emergence  
33    attributed to urbanization, globalization, climate change, population growth, and human/animal  
34    interaction<sup>3</sup>. Currently, there are over 500 known human bacterial pathobionts<sup>4</sup>. Pathobionts are  
35    microorganisms that have the capacity to be pathogenic<sup>5</sup> and range across many taxonomic  
36    classes and genera. Therefore, there exists a wide range in metabolic function, phylogeny, and  
37    infection niches (e.g., stomach, wound, lung) across pathobionts.

38

39    Due to their imminent danger to human health, some pathobiont species have been well  
40    characterized experimentally and computationally<sup>6-8</sup>. However, to gain a deeper understanding  
41    of how pathobionts are evolutionarily related and the principles that govern their differential  
42    functions and ultimately identify novel targeted antimicrobial therapies, we need to consider both  
43    well-characterized and poorly-characterized pathobionts. We can leverage 'omics approaches to  
44    understand the relationship between pathobionts and their physiological environment to shed light  
45    on functional metabolic differences between species. A better characterization of governing  
46    principles of pathobiont function could enable the development of new approaches to target  
47    pathobionts through novel therapies or drug repurposing. Additionally, using antimicrobial  
48    therapies to target environment-specific essential genes rather than organism-specific essential  
49    genes could reduce the harmful effects of broad-spectrum antimicrobials<sup>9</sup>

50  
51 Genome-scale metabolic network reconstructions (GENREs) for can be used to elucidate the  
52 functional metabolic mechanisms of individual pathobionts<sup>6,10</sup>. Once assembled, GENREs can  
53 probe an organism's genotype-phenotype relationship through constraint-based modeling and  
54 analysis (COBRA)<sup>11</sup>. Computational modeling through GENREs has proven effective at defining  
55 functional metabolism in individual priority pathogens, allowing for interpretation of mechanisms  
56 of infection and antibiotic resistance<sup>10</sup>.

57  
58 Here, we determined the evolutionary relatedness of metabolic phenotypes across pathobionts  
59 and the role of isolate environment in functional metabolic adaptation. We characterized the  
60 correlation of functional metabolism with the physiological niche of a pathobiont. We also  
61 predicted novel antimicrobial targets for pathobionts specific to a given physiological niche. To  
62 address the above questions, we generated the first database of GENREs of all known bacterial  
63 pathobionts (referred to as PATHGENN) with a current total of 914 *in silico* models of pathobiont  
64 metabolism, which can serve as a key resource for the community.

## 65 66 **RESULTS**

### 67 The PATHGENN Database

68 We created PATHGENN, a database of GENREs for all known human bacterial pathobionts  
69 through an automated pipeline (Figure S1). PATHGENN utilizes publicly available genome  
70 sequences from the Bacterial and Viral Bioinformatics Resource Center (BV-BRC)<sup>12</sup> paired with  
71 open-source software including Python and COBRApy<sup>11</sup>, and a recently developed GENRE  
72 reconstruction algorithm<sup>13</sup>. The PATHGENN database is the first to contain GENREs of all known  
73 human bacterial pathobionts and is among the largest publicly available databases of GENREs  
74<sup>14,15</sup>. PATHGENN consists of 914 GENREs, covering 345 species, 94 genera, 36 orders, 17  
75 classes, and 9 phyla (Figure 1a, c) of pathobionts. PATHGENN GENREs account for the function  
76 of a sum total of 1.27 million reactions (6,304 unique reactions), 1.22 million genes, and 1.20  
77 million metabolites. Each GENRE contains an average of 1,355 reactions (standard deviation:  
78 344), 1,310 genes (standard deviation: 593), and 1,394 metabolites (standard deviation: 331)  
79 (Figure 1b). The relationship between the number of genes and reactions in the reconstructions  
80 is logarithmic, which is consistent with the expectation that there are limited evolutionary  
81 advantages for bacteria with increasingly large genomes<sup>16</sup>(Figure 1d).

82  
83 KEGG reaction annotations were utilized and reactions across all PATHGENN GENREs were  
84 separated into core (present in > 75% of GENREs), accessory (between 25% and 75%), and  
85 unique (present in < 25%) metabolism. There are 2,515 annotated unique reactions, 1,044  
86 annotated accessory reactions, and 752 annotated core reactions (Figure 2a). The large number  
87 of unique reactions can be attributed to the size of the PATHGENN database and the taxonomic  
88 range PATHGENN GENREs represent. Furthermore, we determined notable differences in the  
89 unique and core metabolic subsystems through KEGG reaction subsystem annotation. More  
90 unique reactions were involved in xenobiotic metabolism (7% more), terpenoid/polyketide  
91 metabolism (11% more), and carbohydrate metabolism (4% more). Additionally, more core  
92 reactions were involved in nucleotide metabolism (7% more), and cofactor/vitamin metabolism  
93 (2% more) (Figure 2b).

### 94 95 Metabolic Phenotype Evolution

96 To understand the evolutionary relationship between pathobionts and their essential genes and  
97 network structure (two important attributes of functional metabolism), we calculated predicted  
98 essential genes, genetic distance between all pairs of pathobionts, and delineated differences in  
99 the reactions present in each organism. For each strain, essential gene profiles were determined

100 by using an FBA single-gene-knockout method in COBRApy. Given gene essentiality is a function  
101 of the organism's physiological environment, for this analysis all exchange reactions were open  
102 which results in the minimum number of essential genes for a given organism. Reaction presence  
103 profiles were created by probing the model in COBRApy (see Methods). These analyses  
104 produced binary profiles describing the presence of all essential genes and reactions in each  
105 model, which were subsequently used to calculate pairwise dissimilarity. The evolution of  
106 essential gene and reaction presence profiles is shown in Figures 3 and S2, respectively. Both  
107 relationships can be approximated with a three-parameter logarithmic growth function.  
108 Additionally, the logarithmic function reaches a saturation point ( $x | y = 1.0$ ) for essential gene  
109 dissimilarity and reaction presence dissimilarity.

110  
111 The saturation points observed in Figure 3 are indicative of conserved essential genes and  
112 reactions, respectively, across bacterial strains. That is, even at genetic difference of 100%, a  
113 pair of pathobionts will be only 18% different with respect to the essential gene profiles, and 34%  
114 different with respect to the reaction presence profiles. A previous study<sup>17</sup> determined a similar  
115 relationship between essential gene profiles and genetic distance across bacteria (not specifically  
116 pathobionts), but determined a saturation point of ~53% essential gene difference. This  
117 discrepancy in essential gene saturation point could be attributed to possible inherent pathobiont  
118 similarities that are not shared across all genera of bacteria. With host infection as a shared  
119 functional process of pathobionts, this result could suggest a shared functional signature  
120 associated with infection regardless of the specific niche which is not shared with non-pathobiont  
121 bacteria.

122  
123 Additionally, the logarithmic trends shown in Figure 3 suggests there is adaptive pressure for  
124 closely related pairs of organisms to evolve to occupy their own distinct metabolic niche. As  
125 pathobionts begin to occupy distinct metabolic niches, they continually adapt their metabolic  
126 capabilities to better take advantage of their new environments, suggesting metabolic composition  
127 of the environment as a major governing principle of the evolution of functional metabolism.

128  
129 Essential Gene Metabolic Subsystem Analysis  
130 We further explored the relationship between physiological environment and metabolic function  
131 by essential gene subsystem analysis. We pooled the essential genes for all isolates of a given  
132 environment, and determined the metabolic subsystem distribution through KEGG genes  
133 annotation. Figure 4 shows the metabolic subsystem distribution of essential genes in eight of the  
134 most represented isolate environments: throat, respiratory, lung, stool, ear, stomach, mouth, and  
135 blood. There is significantly different subsystem representation across physiological  
136 environments as determined by an ANOVA test for each subsystem ( $p < 0.05$  for all subsystems).

137  
138 Some of the most notable differences in metabolic subsystem representation were amongst  
139 stomach isolates. There was evident lack of nucleotide metabolism, energy metabolism, and  
140 glycan metabolism in the essential genes of stomach isolates. Additionally, there was a clear  
141 enrichment of amino acid and lipid metabolic subsystems compared to essential gene  
142 subsystems in other isolate environments. The clear differences in metabolic subsystem  
143 utilization by organisms in different environments provides strong evidence for differential  
144 metabolic functional adaptation according to environment.

145  
146 Influence of Environment on Functional Metabolism  
147 Previous studies have delineated a relationship between functional metabolism and taxonomic  
148 class<sup>15,18,19</sup>. While it is clear that taxonomy is a driver for metabolic function, functional metabolism  
149 could also be attributed to physiological environment because an organism's environment

150 influences adaptation. To determine if there is a significant association between functional  
151 metabolism and physiological environment in addition to taxonomic class in pathobionts, we  
152 utilized flux balance analysis (FBA)<sup>20</sup> for each strain (n = 10 samples per strain). t-SNE was used  
153 to reduce the dimensionality of the flux output across strains and for subsequent visualization  
154 (see methods). We colored the t-SNE output on both taxonomic class (Figure 5a) and isolate  
155 environment (Figure 5b). Significant clustering was exhibited in Figure 5a and b (PERMANOVA:  
156  $p < 0.01$ ), suggesting functional metabolism is related to both taxonomic class and isolate  
157 environment.

158  
159 Gammaproteobacteria is the class of bacteria with the largest number of models in PATHGENN  
160 (Figure 5a). However, Gammaproteobacteria isolates came from a variety of sources including  
161 stool, urine, lung, and blood among others (Figure 5b). Gammaproteobacteria is the most genera-  
162 rich taxon of Prokaryotes, containing over 250 genera<sup>21</sup>. This diversity in bacterial genera within  
163 the Gammaproteobacteria suggests a broader range of functional capabilities than other taxa,  
164 providing reasoning for the diverse environments from which Gammaproteobacteria were  
165 isolated. Another notable cluster, Actinomycetia, contains isolates from lung, respiratory, sputum,  
166 and throat sites. *Mycobacterium tuberculosis* and *Actinomyces* species belong to this class and  
167 are known to infect the lungs and throat respectively<sup>22,23</sup>. Clustering of *M. tuberculosis* and  
168 *Actinomyces* suggests organisms in similar environments across the respiratory tract exhibit  
169 similar functional capabilities.

170  
171 A prominent cluster in Figure 5b is associated with bacteria isolated from the stomach. The  
172 stomach environment is highly acidic (pH 1.5 to 2.0)<sup>24</sup>, allowing for only a few key bacteria to take  
173 up residence, one of which is *Helicobacter pylori*. *H. pylori* has adapted to this extremely unique  
174 environment by utilizing differential metabolic pathways<sup>25</sup>. The evident separation of the stomach  
175 cluster from others and the uniqueness of the stomach environment suggests<sup>25</sup> bacteria with  
176 highly unique functional metabolism. This result suggests genes essential to growth in stomach  
177 isolates are uniquely essential compared to pathobionts from other isolation sites. We can  
178 leverage these uniquely essential genes to identify novel antimicrobial targets that are specific to  
179 stomach pathobionts.

#### 180 181 Identifying Site-Specific Antimicrobial Targets

182 To determine genes that are uniquely essential to stomach bacteria, essential genes were  
183 determined for all strains in PATHGENN using an FBA single-gene-knockout method in  
184 COBRApy (see Methods). If a gene was considered essential if  $\geq 80\%$  of strains in an isolate  
185 environment requires the gene to produce biomass. Two genes were identified as uniquely  
186 essential to stomach pathobionts (not essential in any other environment), *fabF* and *tktA*. *fabF*  
187 encodes the beta-ketoacyl-ACP synthase (KAS), implicated in the chain elongation step of fatty  
188 acid synthesis<sup>26</sup>, and *tktA* encodes transketolase (TK), the most critical enzyme in the non-  
189 oxidative pentose phosphate pathway<sup>27</sup>. While neither of these genes are currently known  
190 antimicrobial targets specific to stomach pathobionts, there already exist several antimicrobials  
191 that target these gene products. According to DrugBank<sup>28</sup>, *fabF* is a target of lauric acid. Lauric  
192 acid has been shown to have bactericidal effects against the stomach pathogen *H. pylori* and was  
193 cited to have a lower propensity to develop resistance compared to metronidazole or  
194 tetracycline<sup>29</sup>. Other drugs that target *fabF* and *tktA* are Cerulenin (*fabF*, currently used as an  
195 antifungal antibiotic), Platensimycin (*fabF*, currently in preclinical trials as a MRSA antibiotic), and  
196 Cocarboxylase (*tktA*, currently used to target *tktA* in *E. coli*), although there is no published  
197 literature regarding their use to treat stomach specific infections. The ability to predict lauric acid  
198 as a possible stomach-targeted antimicrobial with indirect literature validation demonstrates the  
199 value of PATHGENN to enable clinical hypothesis generation.

200



201 Additionally, we visualized the pathway structure that the genes *tktA* and *fabF* are implicated in  
202 across three stomach isolates that were captured in the PATHGENN database: *Helicobacter*  
203 *pylori*, *Arcobacter butzleri*, and *Campylobacter coli* using fluxer<sup>30</sup> and adapted the generated  
204 pathways in Figure 6. There are clear differences in pathway structure between the three different  
205 species of stomach isolates.

206

## 207 DISCUSSION

208 Here, we present a novel pipeline for generating GENREs of human bacterial pathobionts and  
209 apply it to create 914 GENREs representing all known bacterial pathobionts, a resource called  
210 PATHGENN. PATHGENN is among the largest databases of GENREs<sup>14,15</sup>, and the first specific  
211 to pathobionts. PATHGENN GENREs adhere to the community benchmarking standards  
212 (MEMOTE, see Methods) and utilizes the ModelSEED namespace. These standards allow  
213 PATHGENN GENREs to be easily used in conjunction with existing models from other sources.  
214 All PATHGENN models are publicly available, and we encourage others to utilize the database  
215 to probe biological and clinically relevant questions not explored here. While the models in  
216 PATHGENN are not manually curated, they were all developed using the same pipeline utilizing  
217 an automated gap-filling process, allowing for a large number of GENREs in PATHGENN to be  
218 directly compared.

219

220 There are a total of 2,515 reactions that were unique to less than 25% of GENREs (unique  
221 reactions) in PATHGENN, while there were 752 reactions that were common in greater than or  
222 equal to 75% of GENREs (core reactions). There is an evident enrichment of nucleotide metabolic  
223 subsystems in core reactions (7% more). This result is consistent with the ubiquitous role of  
224 nucleotide metabolism across bacterial species<sup>31</sup>. Additionally, it has been shown that the  
225 nucleotide metabolism pathway plays a role in pathogenesis, further providing evidence that the  
226 GENREs in PATHGENN accurately capture and represent the biochemical processes in  
227 pathobionts<sup>32</sup>. Furthermore, there was an enrichment of xenobiotic metabolic subsystems in  
228 unique reactions (7% more). Bacterial species evolve to utilize differential xenobiotic pathways to  
229 best make use of ingested compounds through the utilization of different enzymes and  
230 hydrolytic/reduction reactions<sup>33</sup>. The evolution of unique xenobiotic metabolic reaction pathways  
231 allows bacteria to occupy their own metabolic niches and take advantage of their environment.

232

233 Understanding the evolution of metabolic phenotypes can provide important insight into fitness  
234 and adaptation of pathobionts. We used PATHGENN to better understand metabolic evolution in  
235 the context of adaptation through changes in functional metabolism over generational time.  
236 Results presented in Figure 3 (and Figure S2) suggest that there is adaptive pressure for closely  
237 related organisms to occupy their own distinct metabolic niche, which could occur through  
238 possible mechanisms of horizontal gene transfer, random mutation, or other methods. Closely  
239 related pathobionts experience pressure to adapt and quickly occupy a distinct metabolic niche  
240 to avoid competition and ensure the survival of the species. In more distantly related species,  
241 organisms have already adapted to occupy their own unique metabolic niches. It is evident that  
242 organisms continue to specialize after finding their niche, adapting further to gain fitness in their  
243 given environment. This observation suggests a two-phase evolutionary process. First, an initial  
244 diversification of both essential genes and reaction network due to adaptive pressure, followed  
245 by further diversification over generations. Additionally, by definition, pathobionts share a common  
246 function with host infection. Consequently, that shared activity could limit functional differences  
247 even if genetic history of the pathobiont is quite distinct. This concept could explain results in the  
248 logarithmic nature of the relationship between essential gene/reaction similarity and genetic  
249 distance (Figure 3).

250

251 It is important to note that in Figure 3 there is one group of pathobiont pairs that are more  
252 genetically distant from each other. For every pair in this group, one bacterium in the pair is  
253 *Mycolicibacterium fortuitum*, which is an opportunistic pathogen that is responsible for skin and  
254 bone infections belonging to the *actinomycetia* taxonomic class<sup>34</sup>. In this group, the bacteria  
255 paired with *Mycolicibacterium fortuitum* are: seven different *Bacillus* species, two *Vibrio* species,  
256 two *Acinetobacter* species, two *Burkholderia* species, and one *Providencia*, *Enterobacter*, and  
257 *Stenotrophomonas* species. This result suggests that these species are genetically distant from  
258 *Mycolicibacterium fortuitum*, but have more similar essential gene profiles to *Mycolicibacterium*  
259 *fortuitum* than expected according to the log fit function. Additionally, there is a high density of  
260 pathobiont pairs with genetic distances between 0.2 and 0.3. This result suggests that the average  
261 genetic distance between pairs of pathobionts is between 0.2 and 0.3, which is consistent with  
262 what has been found in another study examining pairwise genetic distances (determined by 16S  
263 rRNA sequence alignment) across pairs of bacteria<sup>35</sup>.

264  
265 The analysis of the evolution of metabolic phenotypes suggests that isolate environment could be  
266 a major evolutionary driver of metabolic function. This idea was further confirmed by metabolic  
267 subsystem annotation of essential genes via KEGG orthologs. There was a clear difference in  
268 metabolic subsystem representation of essential genes in different isolate environments (ANOVA  
269 with  $p < 0.05$  for each subsystem). This difference in metabolic subsystem utilization could also  
270 suggest isolates from different isolate environments are functionally different, thereby occupying  
271 distinct metabolic niches.

272  
273 Functional metabolic similarities have been tied to taxonomic class in many studies<sup>14,15,18,19</sup>, but  
274 the underlying importance of isolate environment and its role in driving adaptation is often  
275 underappreciated. We determined that functional metabolism is related to both taxonomic class  
276 and isolation source through FBA, dimensionality reduction and visualization (t-SNE), and  
277 subsequent PERMANOVA ( $p < 0.01$ ). This result provides more support for the hypothesis that  
278 functional metabolism is related to metabolic niche, which has been suggested in previous work  
279<sup>15</sup>. Additionally, within taxonomic classes, there are distinct clusters of flux samples based on  
280 isolate environment. There are visibly distinct clusters of throat, respiratory, lung, ear, stomach,  
281 blood, and stool, which were also shown to have distinct metabolic subsystem utilization in the  
282 essential gene and metabolic subsystem analysis (Figure 4). The corroboration of results in these  
283 two different analyses provides further evidence that isolate environment is a strong factor in the  
284 evolution of metabolic phenotypes.

285  
286 Additionally, within the class of *Epsilonproteobacteria* there are two distinct clusters: a stomach  
287 cluster and a stool cluster. This result further implies that closely related organisms develop  
288 distinct functional metabolic capabilities related to their specific environment to outcompete  
289 related organisms and ensure the survival of the distinct population or species. These results  
290 suggest similarities between organisms that occupy the same environment and not only because  
291 they are phylogenetically related. While phylogeny is undoubtedly related to metabolic phenotype,  
292 it is clear that environment is also a driving factor for the evolution of functional metabolic  
293 characteristics.

294  
295 The most distinct cluster of metabolic flux samples is the stomach cluster, implying these isolates  
296 exhibit strong similarities in functional metabolism. Additionally, this suggests these isolates are  
297 functionally distinct from isolates of different environments. These functional metabolic  
298 differences could be driven by the extreme environment of the stomach, pressuring adaptation.  
299 Distinct metabolic phenotypes in the stomach environment were also shown in Figure 4, with a  
300 visible enrichment of amino acid and lipid metabolism subsystems and a lack of nucleotide,  
301 energy, and glycan metabolic subsystems in the essential genes of stomach isolates.

302  
303 Stomach infection with *H. pylori* can cause a variety of adverse effects including chronic gastritis  
304 leading to complications (peptic ulcer, gastric cancer, lymphoma)<sup>36,37</sup>. Additionally, *H. pylori*  
305 infection is incredibly difficult to treat, requiring multi-antimicrobial regimens and acid  
306 suppressants<sup>36</sup>. Given that stomach isolates are functionally different from isolates in other  
307 environments, we identified two genes, *fabF* and *tktA*, that are uniquely essential to stomach  
308 isolates. Creating antimicrobial therapies specifically targeting these genes could eliminate the  
309 need for multi-antimicrobial regimens and broad-spectrum antibiotics which are associated with  
310 adverse health effects<sup>9</sup>. Additionally, targeted antimicrobial therapies would allow for more rapid  
311 response to infection, since all organisms in an environment can be treated unilaterally with one  
312 antimicrobial so species identification is not necessary. We identified four drugs that target these  
313 genes: lauric acid (*fabF*), Cerulenin (*fabF*), Platensimycin (*fabF*), and Carboxylase (*tktA*). Lauric  
314 acid has been cited to have antimicrobial properties against *H. pylori*, and a lower propensity to  
315 cause the development of resistance than if *H. pylori* were treated with metronidazole or  
316 tetracycline<sup>29</sup>. Since the GENREs in PATHGENN were able to correctly predict lauric acid as an  
317 antimicrobial target, the other three identified drugs could be tested. Additionally, we visualized  
318 the pathways that *fabF* and *tktA* are a part of in three different stomach isolate species (*H. pylori*,  
319 *A. butzleri*, and *C. coli*) (Figure 6). There are clear differences in pathway structure between the  
320 three different species despite *tktA* and *fabF* being essential genes in stomach isolates. This  
321 finding further highlights the importance of investigating unique metabolic functional capabilities  
322 that develop due to adaptive pressures for antimicrobial discovery and drug repurposing.

323  
324 The GENREs in PATHGENN were generated through an automated pipeline, first generating  
325 genome-informed draft network reconstructions then a curation of the reconstructions through an  
326 automated gapfilling process based on parsimony principles. Generating all models through the  
327 same pipeline with the same level of automated curation allows for comparison across all  
328 GENREs for a high-level, cross-genome, analysis of bacterial pathobionts. However, the strength  
329 of the models is dependent on the accuracy and detail of genome annotations. The analyses  
330 presented in this paper could be enhanced by further manual curation of poorly annotated  
331 species.

332  
333 We successfully generated a database of 914 GENREs of all human bacterial pathobionts  
334 (PATHGENN) which we used to investigate the role of environment in adaptation and generation  
335 of unique functional metabolism. Additionally, we were able to use uniquely essential metabolic  
336 genes in pathobionts isolated from the stomach to predict possible targeted antimicrobial options  
337 for treating stomach-specific bacterial infection. We can continue to investigate questions related  
338 to functional metabolism by curating the isolate environment to simulate metabolism in more  
339 specific contexts. This effort will allow for better understanding of the functional metabolic  
340 differences in pathobionts in the context in which they grow as infections. Furthermore, we can  
341 begin to integrate environment-specific functional metabolism and other pertinent metadata to  
342 identify drug targets that are relevant to patient-specific infections. Identifying unique metabolic  
343 functions across pathobiont species is the first step to developing a framework for a personalized  
344 medicine approach to addressing infection in the clinic.

## 345 346 **METHODS**

### 347 GENRE Creation From Genome Sequences

348 We first filtered all genome sequences in the BV-BRC 3.6.12 database to only include those that  
349 were considered “good” quality and “complete”. BV-BRC guidelines define “good” as “a genome  
350 that is sufficiently complete (80%), with sufficiently low contamination (10%)”, and amino acid  
351 sequences that are at least 87% consistent with known protein sequence. “Complete” means that  
352 replicons were completely assembled.

353  
354 There are 538 species of bacterial pathobionts<sup>4</sup>, some of which either do not have publicly  
355 available genome sequences via BV-BRC or do not have “good” and “complete” genome  
356 sequences in BV-BRC. There is at least one NCBI taxid for each pathobiont species, with some  
357 species having multiple unique NCBI taxids. Multiple genome sequences are available in BV-BRC  
358 for each NCBI taxid, so sequences were selected based on the presence of metadata in a  
359 hierarchical nature. Sequences with the most associated metadata were prioritized. If multiple  
360 sequences had the same amount of metadata, we selected the sequence that had isolate  
361 environment-associated metadata. If multiple sequences fulfilled the previous requirements, the  
362 strain that had host health-associated metadata was selected. This hierarchical selection was  
363 continued for metadata categories of isolation country, collection date, and host age, in that order  
364 of priority. The resulting list contained 914 unique genome sequences. This procedure was  
365 automated with a python script.

366  
367 All amino acid sequences were then automatically annotated with RAST 2.0<sup>38,39</sup>, and GENREs  
368 were created for each strain using the Reconstructor<sup>13</sup> algorithm. All models are publicly available  
369 (see Data Availability section). We benchmarked all GENREs using the community standard,  
370 MEMOTE<sup>40</sup>, and have included all scores in stable .html files on GitHub.

#### 371 Genetic Distance and Essential Gene Profile/ Reaction Presence profile distance

372 All sequences used to create GENREs in PATHGENN were re-annotated to determine the rRNA  
373 genome features. All 16S rRNA sequences were extracted from the annotation output, for a total  
374 of 245 16S rRNA sequences, each from a unique PATHGENN strain (still representing the same  
375 9 phyla represented in all 914 PATHGENN GENREs). The 16s rRNA sequences were then  
376 aligned using Clustal Omega and the resulting Percent Identity Matrix was downloaded. Identity  
377 percentages were converted to values between 0 and 1, 0 being the most similar and 1 being the  
378 most different. This value was then converted to a percentage. This metric was defined as the  
379 genetic distance for subsequent analyses.  
380

381  
382 Essential gene profiles for each of the corresponding 245 GENREs (those with available 16s  
383 rRNA sequences) using an FBA-based, single-gene-knockout method in COBRAPy  
384 (`cobra.flux_analysis.variability.find_essential_genes()`). Essential genes were then converted to  
385 KEGG Orthologs, and a binary matrix was created indicating essential gene presence in each  
386 strain (1 = presence, 0 = absence). The pairwise essential gene distance was defined as the  
387 calculated hamming distances<sup>41</sup> between each strain’s essential gene profile.  
388

389 Reaction presence was determined for each of 245 GENREs via model probing in COBRAPy. A  
390 binary matrix was created indicating reaction presence or absence in each strain (1 = presence,  
391 0 = absence). The pairwise reaction presence distance was defined as the calculated hamming  
392 distances between each strain’s reaction presence profile.  
393

394 Genetic distance vs essential gene distance, and genetic distance vs reaction presence distance  
395 were plotted for each pair of pathobionts. Logarithmic functions were fit to both plots using the  
396 `scipy.optimize.curve_fit` function in the python `scipy` toolbox.  
397

#### 398 FBA and t-SNE Dimensionality Reduction/Visualization

399 For each of the 914 models, Flux Balance Analysis (FBA) was performed using the COBRAPy  
400 toolbox for each model in PATHGENN to capture metabolic flux through all model reactions. 10  
401 flux samples were taken per model for a total of 9,140 flux samples.  
402



403 t-distributed stochastic neighbor embedding (t-SNE)<sup>42</sup> was used for dimensionality and  
404 subsequent visualization of the FBA output. The perplexity parameter was optimized to preserve  
405 local and global relationships in the data using  $P = N^{\frac{1}{2}}$ , where P = perplexity, and N = number of  
406 points. Points were colored based on taxonomic class, and subsequently colored on isolation  
407 source for visualization purposes. Significant clusters in both taxonomic class and isolation site t-  
408 SNE outputs were determined using a PERMANOVA<sup>43</sup> test.

409  
410 To ensure that 10 flux samples was sufficient to capture the flux solution space as well as 100  
411 flux samples per model would, we ran paired-down t-SNE analyses. We randomly sampled 100  
412 GENREs from the 914 total GENREs in PATHGENN. Then, for each of those 100 GENREs we  
413 used 100 flux samples to perform dimensionality reduction and subsequent visualization via t-  
414 SNE (Figure S3). We performed this analysis three times, to ensure that the results would hold  
415 true for multiple randomly selected subsets of GENREs.

416  
417 Through this subsequent t-SNE analysis, we still see clustering by taxonomic class in figure S3.  
418 Specifically, we still see large clusters of *Gammaproteobacteria* and *Actinomycetia*. Additionally,  
419 we still see the separation of *Epsilonproteobacteria* into distinct clusters, one of which is  
420 completely comprised of stomach isolates.

421  
422 *Determination of Novel Antibiotics to Target Stomach Isolates*  
423 Essential genes for all 914 models were determined using an FBA based single-gene-knockout  
424 method in COBRApy (cobra.flux\_analysis.variability.find\_essential\_genes()). All essential genes  
425 were translated to KEGG orthologs. Strains and their corresponding essential genes were  
426 grouped by isolation site. Essential genes present in  $\geq 80\%$  of strains in a given isolation source  
427 were defined as uniquely essential to that isolation source. Uniquely essential genes present in  
428 stomach isolates that are not uniquely essential to other isolation sites were selected. DrugBank<sup>28</sup>  
429 was used to identify drugs that target uniquely essential genes of stomach isolates.

## 430 431 REFERENCES

- 432 1. Wang, H., Naghavi, M., Allen, C., Barber, R.M., Bhutta, Z.A., Carter, A., Casey, D.C.,  
433 Charlson, F.J., Chen, A.Z., Coates, M.M., et al. (2016). Global, regional, and national life  
434 expectancy, all-cause mortality, and cause-specific mortality for 249 causes of death,  
435 1980–2015: a systematic analysis for the Global Burden of Disease Study 2015. The  
436 Lancet 388, 1459–1544. 10.1016/S0140-6736(16)31012-1.
- 437 2. Smith, K.M., Machalaba, C.C., Seifman, R., Feferholtz, Y., and Karesh, W.B. (2019).  
438 Infectious disease and economics: The case for considering multi-sectoral impacts. One  
439 Health 7. 10.1016/j.onehlt.2018.100080.
- 440 3. Bloom, D.E., and Cadarette, D. (2019). Infectious disease threats in the twenty-first  
441 century: Strengthening the global response. Front Immunol 10.  
442 10.3389/fimmu.2019.00549.
- 443 4. Taylor, L.H., Latham, S.M., and Woolhouse, M.E.J. (2001). Risk factors for human  
444 disease emergence. Philosophical Transactions of the Royal Society B: Biological  
445 Sciences 356, 983–989. 10.1098/rstb.2001.0888.
- 446 5. Chandra, H., Sharma, K.K., Tuovinen, O.H., Sun, X., and Shukla, P. (2021). Pathobionts:  
447 mechanisms of survival, expansion, and interaction with host with a focus on  
448 *Clostridioides difficile*. Gut Microbes 13. 10.1080/19490976.2021.1979882.
- 449 6. Dunphy, L.J., Yen, P., and Papin, J.A. (2019). Integrated Experimental and  
450 Computational Analyses Reveal Differential Metabolic Functionality in Antibiotic-Resistant  
451 *Pseudomonas aeruginosa*. Cell Syst 8, 3-14.e3. 10.1016/j.cels.2018.12.002.

- 452 7. Dinges, M.M., Orwin, P.M., and Schlievert, P.M. (2000). Exotoxins of *Staphylococcus*  
453 *aureus*.
- 454 8. Kellogg, D.S., Peacock, W.L., Deacon, W.E., Brown, L., and Pirkle, C.I. NEISSERIA  
455 GONORRHOEAE I. VIRULENCE GENETICALLY LINKED TO CLONAL VARIATION  
456 (Communicable Disease Center).
- 457 9. Wiens, J., Snyder, G.M., Finlayson, S., Mahoney, M. v., and Celi, L.A. (2018). Potential  
458 adverse effects of broad-spectrum antimicrobial exposure in the intensive care unit. *Open*  
459 *Forum Infect Dis* 5. 10.1093/ofid/ofx270.
- 460 10. Sertbas, M., and Ulgen, K.O. (2020). Genome-Scale Metabolic Modeling for Unraveling  
461 Molecular Mechanisms of High Threat Pathogens. *Front Cell Dev Biol* 8.  
462 10.3389/fcell.2020.566702.
- 463 11. Ebrahim, A., Lerman, J.A., Palsson, B.O., and Hyduke, D.R. (2013). COBRApy:  
464 COstraints-Based Reconstruction and Analysis for Python. *BMC Syst Biol* 7.  
465 10.1186/1752-0509-7-74.
- 466 12. Davis, J.J., Wattam, A.R., Aziz, R.K., Brettin, T., Butler, R., Butler, R.M., Chlenski, P.,  
467 Conrad, N., Dickerman, A., Dietrich, E.M., et al. (2020). The PATRIC Bioinformatics  
468 Resource Center: Expanding data and analysis capabilities. *Nucleic Acids Res* 48, D606–  
469 D612. 10.1093/nar/gkz943.
- 470 13. Jenior+, M.L., Glass+, E.M., and Papin, J.A. Title Reconstructor: A COBRApy compatible  
471 tool for automated genome-scale metabolic network reconstruction with parsimonious  
472 flux-based gap-filling. 10.1101/2022.09.17.508371.
- 473 14. Magnúsdóttir, S., Heinken, A., Kutt, L., Ravcheev, D.A., Bauer, E., Noronha, A.,  
474 Greenhalgh, K., Jäger, C., Baginska, J., Wilmes, P., et al. (2017). Generation of genome-  
475 scale metabolic reconstructions for 773 members of the human gut microbiota. *Nat*  
476 *Biotechnol* 35, 81–89. 10.1038/nbt.3703.
- 477 15. Carey, M.A., Medlock, G.L., Stolarczyk, M., Petri, W.A., Guler, J.L., and Papin, J.A.  
478 (2022). Comparative analyses of parasites with a comprehensive database of geno-scale  
479 metabolic models. *PLoS Comput Biol* 18. 10.1371/journal.pcbi.1009870.
- 480 16. Lefébure, T., Morvan, C., Malard, F., François, C., Konecny-Dupré, L., Guéguen, L.,  
481 Weiss-Gayet, M., Seguin-Orlando, A., Ermini, L., Sarkissian, C. der, et al. (2017). Less  
482 effective selection leads to larger genomes. *Genome Res* 27, 1016–1028.  
483 10.1101/gr.212589.116.
- 484 17. Plata, G., Henry, C.S., and Vitkup, D. (2015). Long-term phenotypic evolution of bacteria.  
485 *Nature* 517, 369–372. 10.1038/nature13827.
- 486 18. Lee, C.C., Lo, W.C., Lai, S.M., Chen, Y.P.P., Tang, C.Y., and Lyu, P.C. (2012). Metabolic  
487 classification of microbial genomes using functional probes. *BMC Genomics* 13.  
488 10.1186/1471-2164-13-157.
- 489 19. Luo, G., Fotidis, I.A., and Angelidaki, I. (2016). Comparative analysis of taxonomic,  
490 functional, and metabolic patterns of microbiomes from 14 full-scale biogas reactors by  
491 metagenomic sequencing and radioisotopic analysis. *Biotechnol Biofuels* 9.  
492 10.1186/s13068-016-0465-6.
- 493 20. Orth, J.D., Thiele, I., and Palsson, B.O. (2010). What is flux balance analysis? *Nat*  
494 *Biotechnol* 28, 245–248. 10.1038/nbt.1614.
- 495 21. Williams, K.P., Gillespie, J.J., Sobral, B.W.S., Nordberg, E.K., Snyder, E.E., Shalom,  
496 J.M., and Dickerman, A.W. (2010). Phylogeny of gammaproteobacteria. *J Bacteriol* 192,  
497 2305–2314. 10.1128/JB.01480-09.
- 498 22. Smith, I. (2003). *Mycobacterium tuberculosis* pathogenesis and molecular determinants  
499 of virulence. *Clin Microbiol Rev* 16, 463–496. 10.1128/CMR.16.3.463-496.2003.
- 500 23. Hasan, M., and Kumar, A. (2011). Actinomycosis and tonsillar disease. *BMJ Case Rep*.  
501 10.1136/bcr.01.2011.3750.

- 502 24. Fujimori, S. (2020). Gastric acid level of humans must decrease in the future. *World J*  
503 *Gastroenterol* 26, 6706–6709. 10.3748/wjg.v26.i43.6706.
- 504 25. Lee, W.C., Goh, K.L., Loke, M.F., and Vadivelu, J. (2017). Elucidation of the Metabolic  
505 Network of *Helicobacter pylori* J99 and Malaysian Clinical Strains by Phenotype  
506 Microarray. *Helicobacter* 22. 10.1111/hel.12321.
- 507 26. Edwards, P., Nelsen, J.S., Metz, J.G., and Dehesh, K. (1997). Cloning of the *fabF* gene in  
508 an expression vector and in vitro characterization of recombinant *fabF* and *fabB* encoded  
509 enzymes from *Escherichia coli*. *FEBS Lett* 402, 62–66. 10.1016/S0014-5793(96)01437-8.
- 510 27. Jung, Y.-M., Lee, J.-N., Shin, H.-D., and Lee, Y.-H. (2004). Role of *tktA* gene in pentose  
511 phosphate pathway on odd-ball biosynthesis of poly- $\beta$ -hydroxybutyrate in transformant  
512 *Escherichia coli* harboring *phbCAB* operon. *J Biosci Bioeng* 98, 224–227.
- 513 28. Wishart, D.S., Knox, C., Guo, A.C., Shrivastava, S., Hassanali, M., Stothard, P., Chang,  
514 Z., and Woolsey, J. (2006). DrugBank: a comprehensive resource for in silico drug  
515 discovery and exploration. *Nucleic Acids Res* 34. 10.1093/nar/gkj067.
- 516 29. Jung, S.W., and Lee, S.W. (2016). The antibacterial effect of fatty acids on *Helicobacter*  
517 *pylori* infection. *Korean Journal of Internal Medicine* 31, 30–35.  
518 10.3904/kjim.2016.31.1.30.
- 519 30. Hari, A., and Lobo, D. (2020). Fluxer: A web application to compute, analyze and  
520 visualize genome-scale metabolic flux networks. *Nucleic Acids Res* 48, W427–W435.  
521 10.1093/NAR/GKAA409.
- 522 31. Lopatkin, A.J., and Yang, J.H. (2021). Digital Insights Into Nucleotide Metabolism and  
523 Antibiotic Treatment Failure. *Front Digit Health* 3. 10.3389/fgdth.2021.583468.
- 524 32. Goncheva, M.I., Chin, D., and Heinrichs, D.E. (2022). Nucleotide biosynthesis: the base  
525 of bacterial pathogenesis. *Trends Microbiol* 30, 793–804. 10.1016/j.tim.2021.12.007.
- 526 33. Koppel, N., Rekdal, V.M., and Balskus, E.P. (2017). Chemical transformation of  
527 xenobiotics by the human gut microbiota. *Science* (1979) 356, 1246–1257.  
528 10.1126/science.aag2770.
- 529 34. Morgado, S., Ramos, N. de V., Freitas, F., da Fonseca, É.L., and Vicente, A.C. (2021).  
530 *Mycolicobacterium fortuitum* genomic epidemiology, resistome and virulome. *Mem Inst*  
531 *Oswaldo Cruz* 116. 10.1590/0074-02760210247.
- 532 35. Bukin, Y.S., Galachyants, Y.P., Morozov, I. v., Bukin, S. v., Zakharenko, A.S., and  
533 Zemskaia, T.I. (2019). The effect of 16s rRNA region choice on bacterial community  
534 metabarcoding results. *Sci Data* 6. 10.1038/sdata.2019.7.
- 535 36. Jenks, P.J. (2002). Causes of failure of eradication of *Helicobacter pylori*. *Br Med J* 325,  
536 3–4. 10.1136/bmj.325.7354.3.
- 537 37. Buzás, G.M. (2014). Metabolic consequences of *Helicobacter pylori* infection and  
538 eradication. *World J Gastroenterol* 20, 5226–5234. 10.3748/wjg.v20.i18.5226.
- 539 38. Brettin, T., Davis, J.J., Disz, T., Edwards, R.A., Gerdes, S., Olsen, G.J., Olson, R.,  
540 Overbeek, R., Parrello, B., Pusch, G.D., et al. (2015). RASTtk: A modular and extensible  
541 implementation of the RAST algorithm for building custom annotation pipelines and  
542 annotating batches of genomes. *Sci Rep* 5. 10.1038/srep08365.
- 543 39. Aziz, R.K., Bartels, D., Best, A., DeJongh, M., Disz, T., Edwards, R.A., Formosa, K.,  
544 Gerdes, S., Glass, E.M., Kubal, M., et al. (2008). The RAST Server: Rapid annotations  
545 using subsystems technology. *BMC Genomics* 9. 10.1186/1471-2164-9-75.
- 546 40. Lieven, C., Beber, M.E., Olivier, B.G., Bergmann, F.T., Ataman, M., Babaei, P., Bartell,  
547 J.A., Blank, L.M., Chauhan, S., Correia, K., et al. MEMOTE for standardized genome-  
548 scale metabolic model testing. 10.5281/zenodo.2636858.
- 549 41. Hamming, R.W. (1950). Error detecting and error correcting codes. *Comput. Arith.*
- 550 42. van der Maaten, L., and Hinton, G. (2008). Visualizing Data using t-SNE.

- 551 43. Anderson, M.J. (2017). Permutational Multivariate Analysis of Variance ( PERMANOVA )  
552 . In Wiley StatsRef: Statistics Reference Online (Wiley), pp. 1–15.  
553 10.1002/9781118445112.stat07841.  
554 44. Asnicar, F., Weingart, G., Tickle, T.L., Huttenhower, C., and Segata, N. (2015). Compact  
555 graphical representation of phylogenetic data and metadata with GraPhlAn. *PeerJ* 2015.  
556 10.7717/peerj.1029.  
557 45. Wattam, A.R., Abraham, D., Dalay, O., Disz, T.L., Driscoll, T., Gabbard, J.L., Gillespie,  
558 J.J., Gough, R., Hix, D., Kenyon, R., et al. (2014). PATRIC, the bacterial bioinformatics  
559 database and analysis resource. *Nucleic Acids Res* 42. 10.1093/nar/gkt1099.  
560  
561

## 562 **ACKNOWLEDGEMENTS**

563 **Funding:** This work was supported by the NSF GRFP award number 1842490, the University of  
564 Virginia NIH Systems and Biomolecular Data Sciences Training Grant (grant number 1 T32 GM  
565 145443-1), NIH R01s (R01-AI154242 and R01-AT010253) .

566 **Author Contributions:** E.M.G and J.A.P conceived of the project. E.M.G generated the  
567 PATHGENN collection and performed subsequent analyses. E.M.G wrote the initial manuscript  
568 draft. L.R.D aided in data analysis. A.S.W assisted with model annotation. E.M.G, L.R.D, A.S.W,  
569 and J.A.P edited and approved the manuscript for final submission.

570 **Data availability:** All PATHGENN GENRE models are publicly available on GitHub along with  
571 MEMOTE benchmarking scores and all pertinent code to this study:  
572 <https://github.com/emmamglass/PATHGENN>.



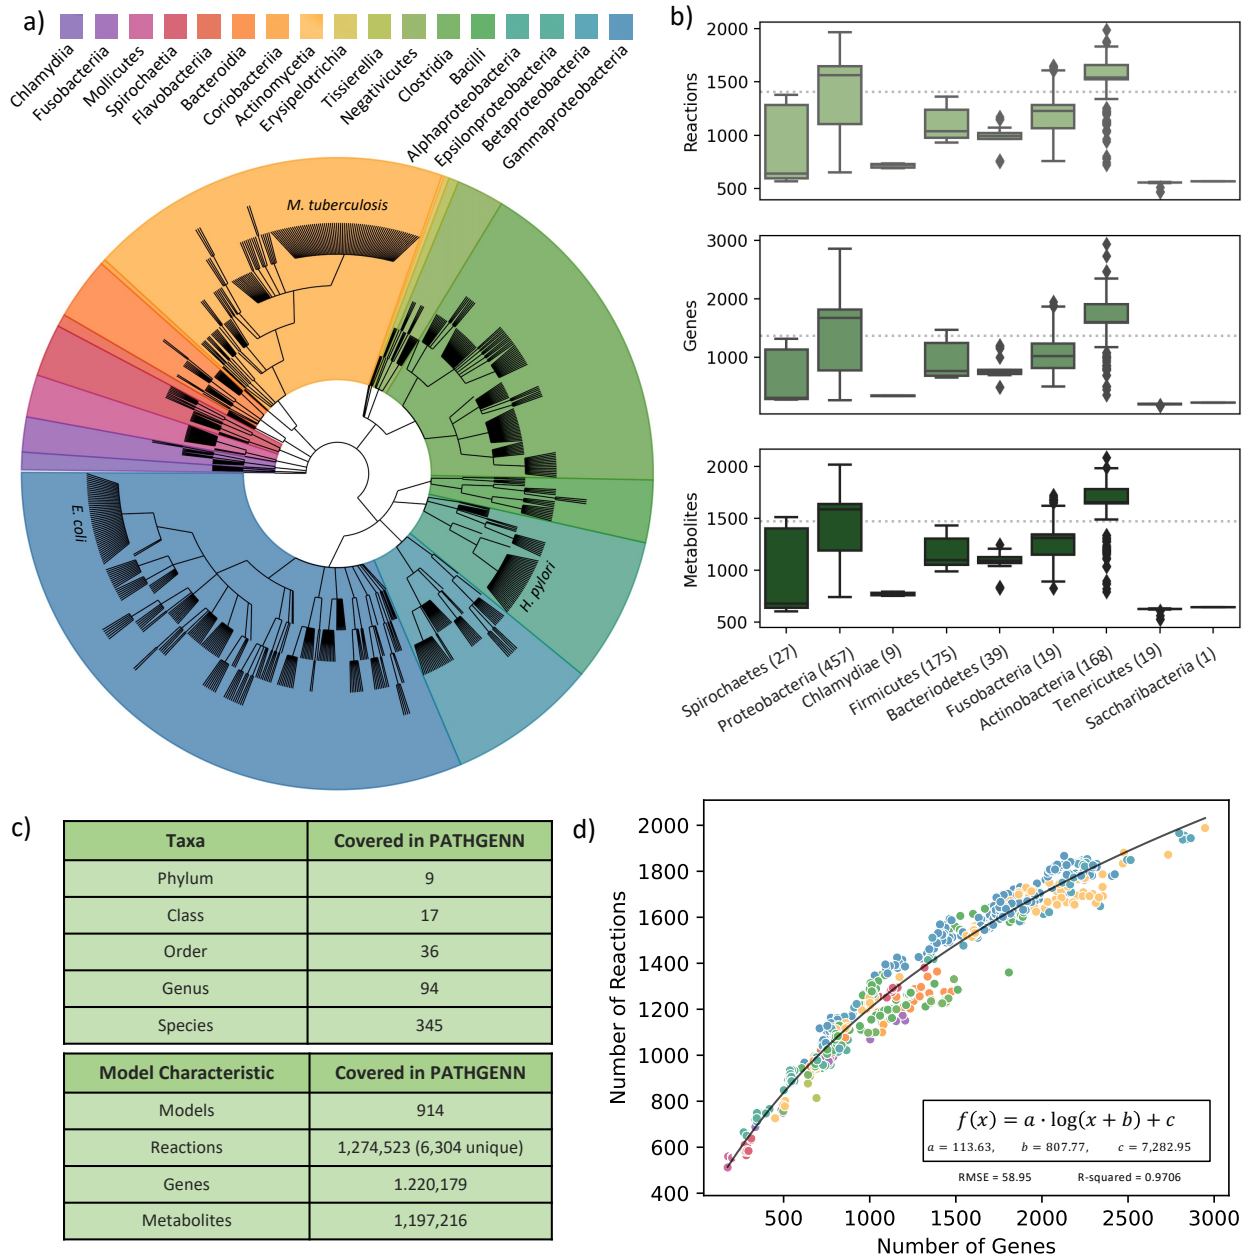

**Figure 1 | Scope of the PATHGENN database.** (a) Phylogenetic tree depicting the diversity of 914 considered bacterial pathobionts in PATHGENN. It is important to note there are many strains of *E. coli*, *H. pylori*, and *M. tuberculosis* included in the database. This cladogram was created using the GraPhlAn<sup>44</sup> python tool. (b) Boxplots representing the spread of genes, reactions, and metabolites in each model, classified by phylum. The number in parentheses after the phylum name represents how many models are in that respective phylum. (c) PATHGENN represents 9 phyla, 17 classes, 36 orders, 94 genera, and 345 species of pathobionts. Across the 914 models, there are a sum total of 1.27 million reactions, 1.22 million genes, and 1.20 metabolites. (d) The relationship between the number of genes and the number of reactions in each model displays a positive trend and heteroscedasticity similar to other model ensembles<sup>15</sup>. Colors correspond to taxonomic class of pathobiont represented by each point (same legend as Figure 1 a)

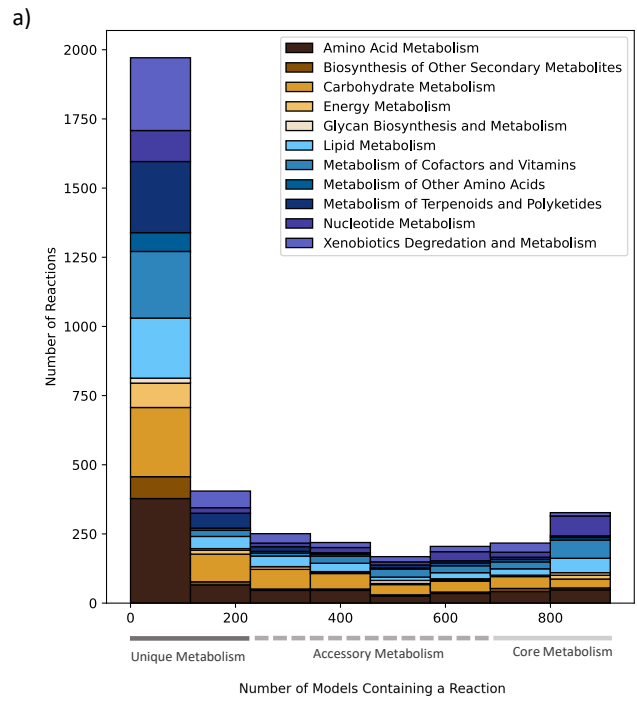

**Figure 2 | Core and unique metabolic reaction subsystems across pathobionts.** (a) Histogram of annotated reactions across models display prevalent reaction classes used in core metabolism (>75% models have a given reaction) and unique metabolism (<25% models have a given reaction). Notably, the reaction classes xenobiotic degradation/metabolism and metabolism of terpenoids/polyketides are much more prevalent in unique reactions than core reactions. PATHGENN is largest database of GENRES to date (914 GENRES representing 345 species), and the first to include all bacterial pathobionts. (b) Different metabolic subsystems are enriched in core and unique reactions. Amino acid, Xenobiotics, and Terpenoid/Polyketide metabolism is noticeably enriched in unique reactions, while Nucleotide metabolism is noticeably enriched in core reactions.

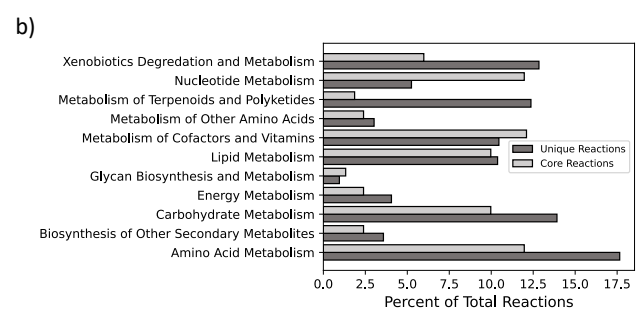

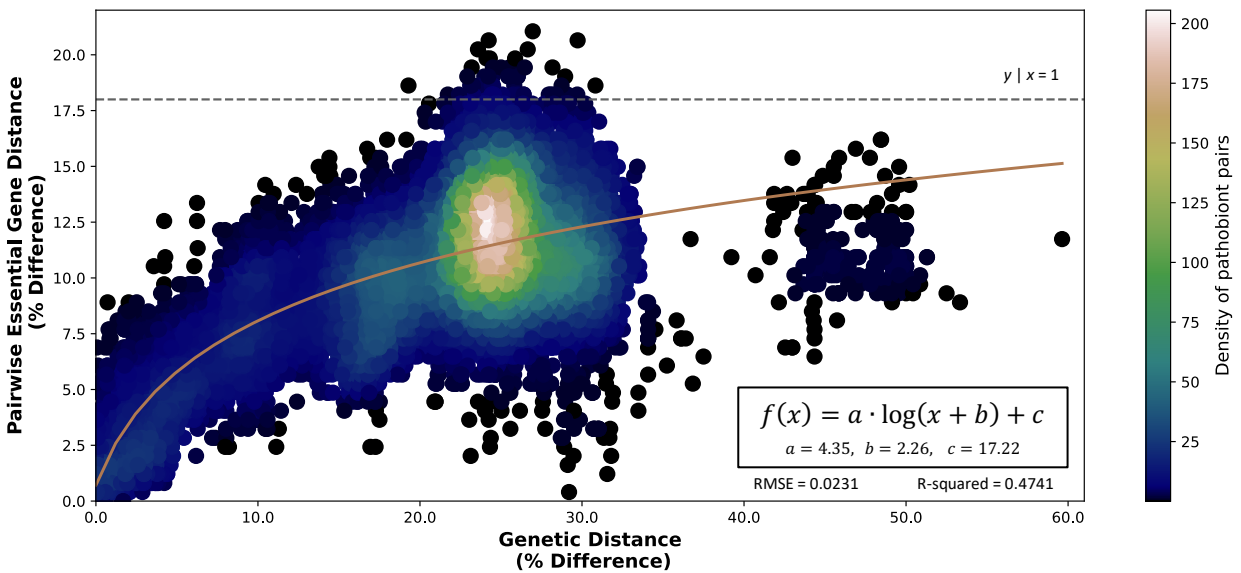

**Figure 3 | Differences in metabolic function of pathobiont pairs are related to their genetic distance.** The relationship between pairwise essential gene profile distance and genetic distance of 245 pathobionts suggests adaptive pressure for closely related pairs of organisms to evolve to occupy their own distinct metabolic niche. This result further suggests that metabolic composition of environment is a major governing principle of evolution of functional metabolism.

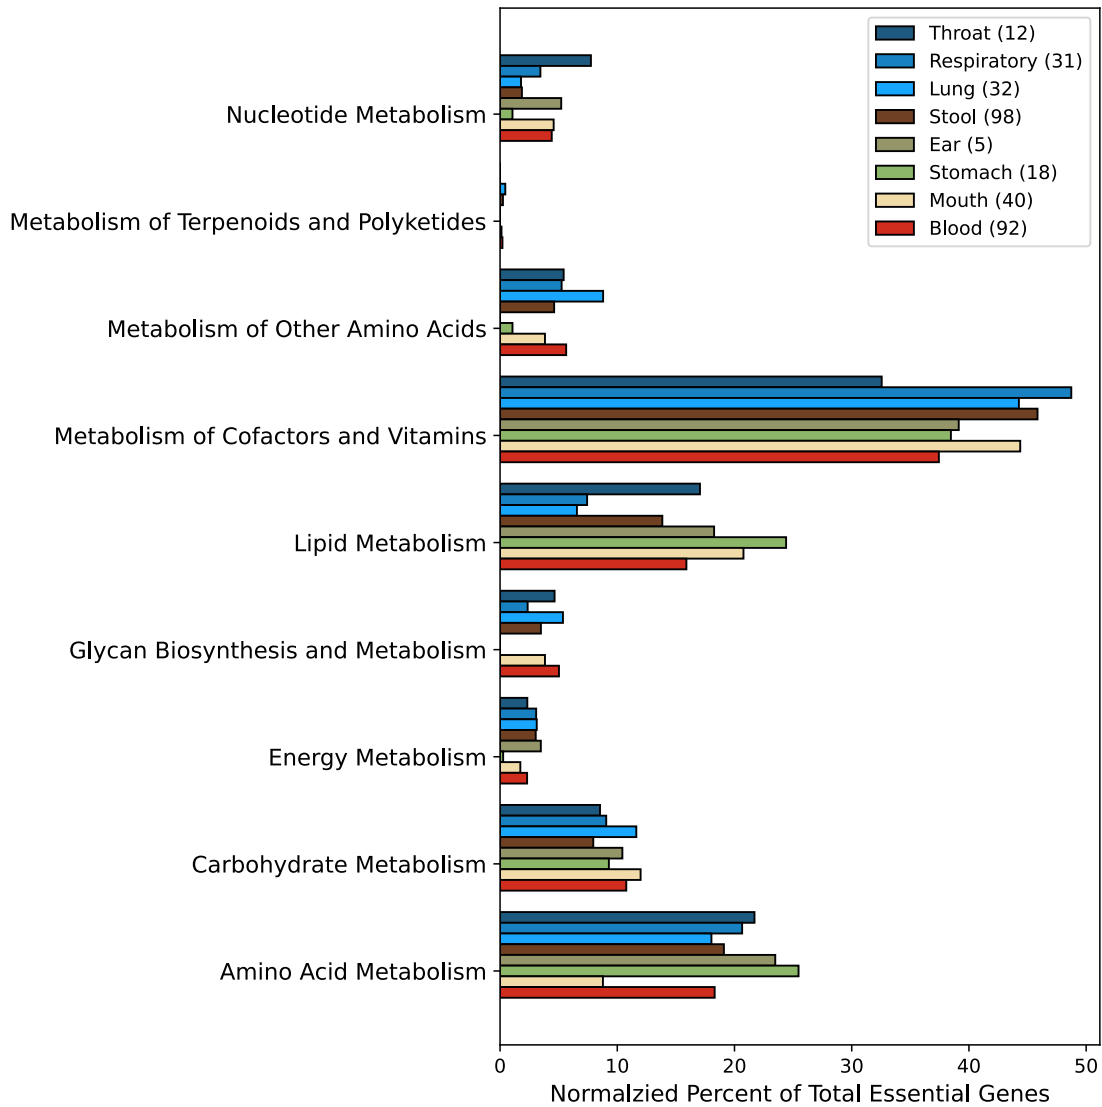

**Figure 4 | Essential gene subsystems vary by isolate location.** Enrichment of amino acid and lipid metabolism in stomach isolates is evident, along with an absence of essential genes used in glycan biosynthesis and energy metabolism. Each subsystem indicates differential metabolic subsystem utilization by isolate location (ANOVA  $p < 0.05$ ).



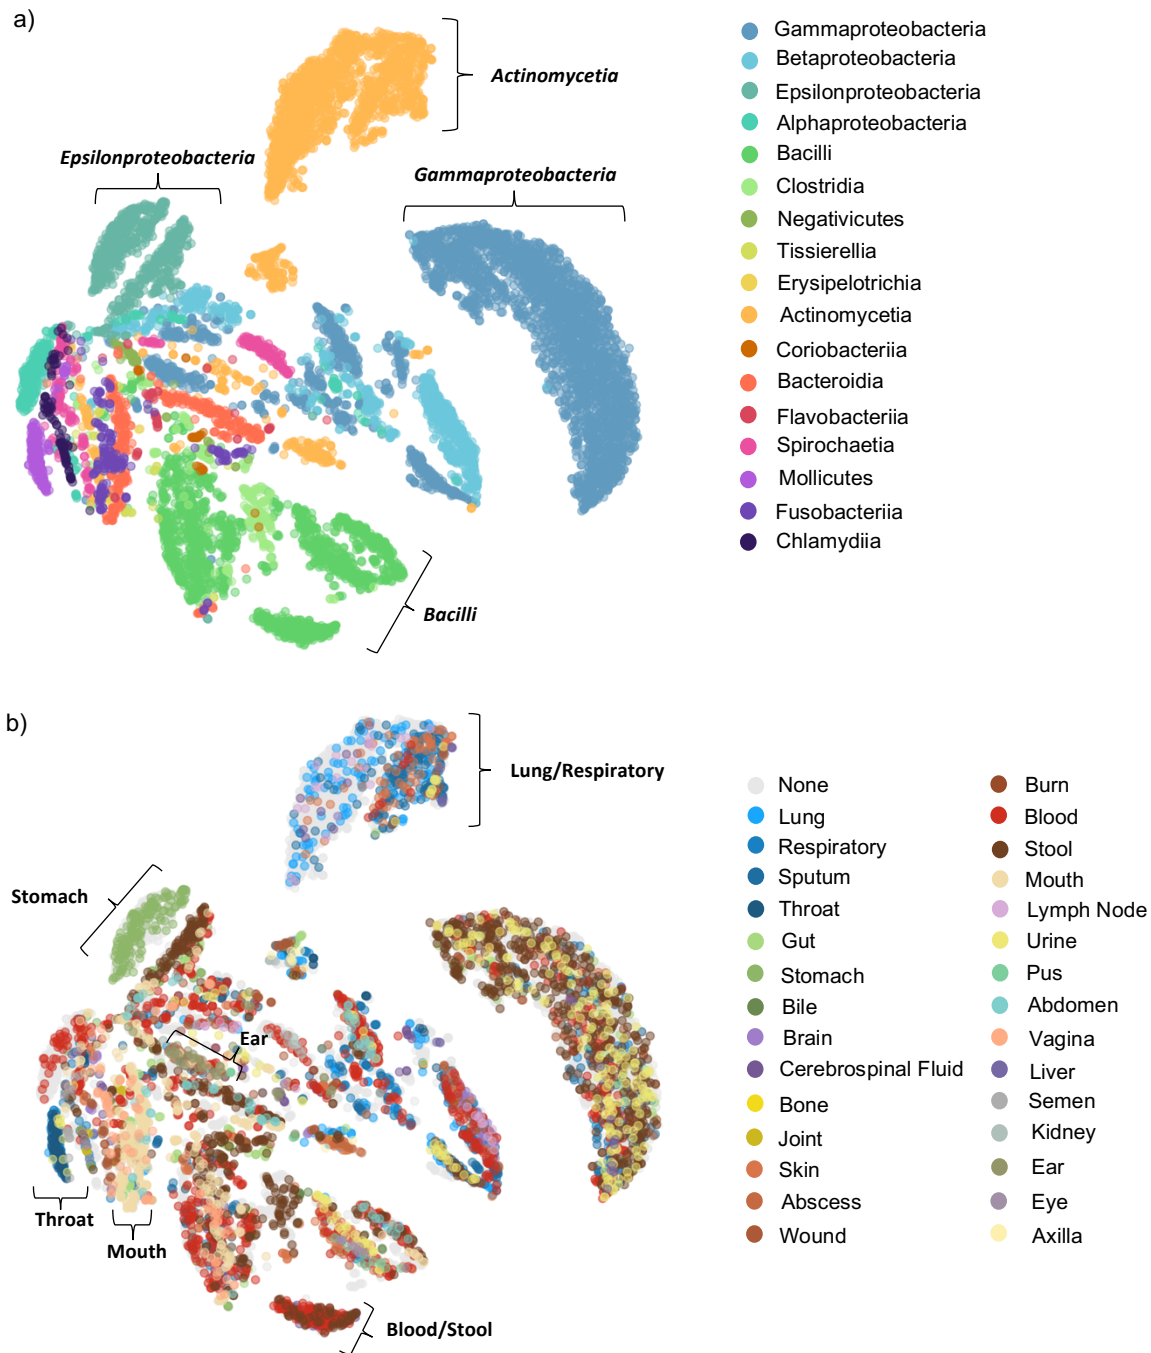

**Figure 5 | tSNE of Flux Samples Clustering on Taxonomic Class and Isolation Site.** 10 flux samples across all 914 GENRES were plotted using tSNE, and points were colored on taxonomic class (a) and isolation site (b).

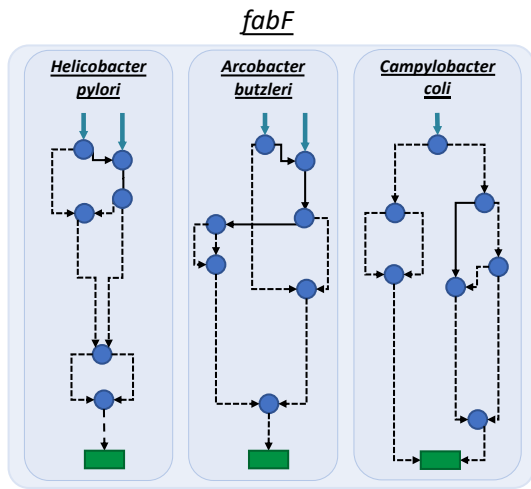

**Figure 6 | *fabF* (a) and *tktA* (b) metabolic pathways in three stomach pathogens: *Helicobacter pylori*, *Arcobacter butzleri*, and *Campylobacter coli*.** There are differences in pathway structures in both *fabF* and *tktA* pathways across three stomach pathogens. This figure was adapted from pathways generated with fluxer<sup>30</sup>.

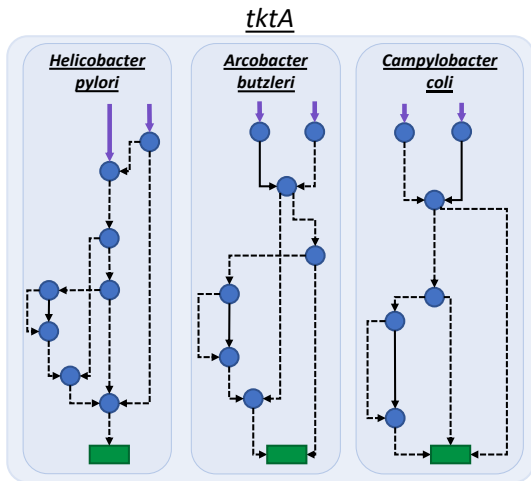

- Reaction catalyzed by B-ketoacyl-ACP synthase (*fabF* gene product)
- Reaction catalyzed by Transketolase (*tktA* gene product)
- Reaction
- - - Reaction Chain
- Metabolite
- Biomass Reaction

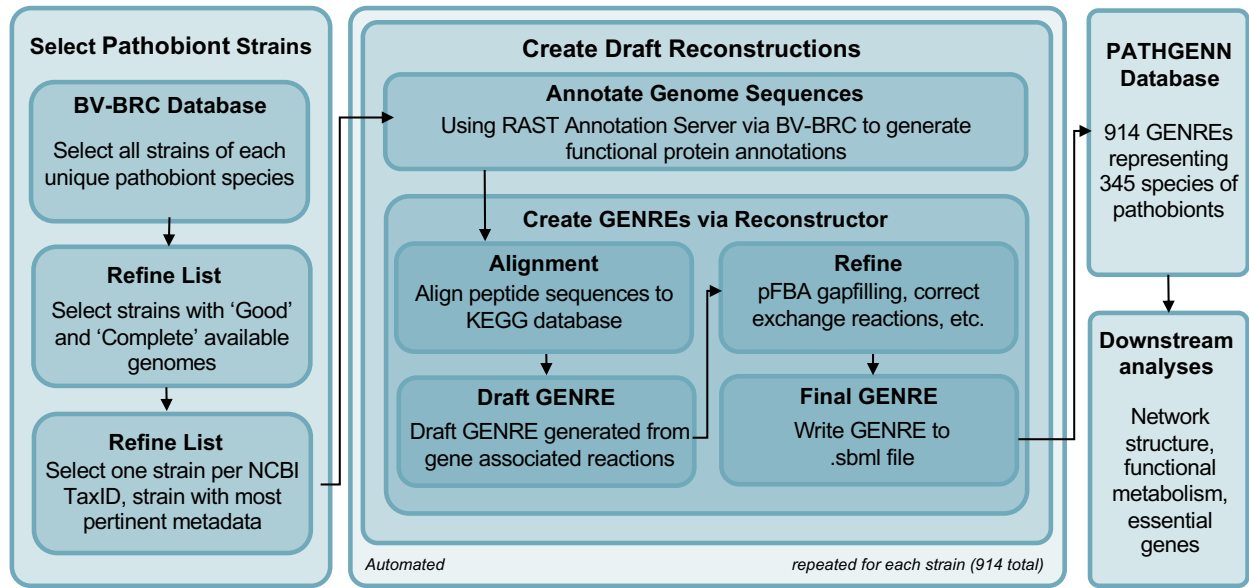

**S1 | PATHGENN Development Pipeline.** The BV-BRC database<sup>45</sup> was used to select pathobiont genome strains that satisfied quality criteria. These genome strains were then annotated using the RAST annotation toolbox<sup>38,39</sup> to generate the amino acid FASTA file that was then used in Reconstructor<sup>13</sup> to generate the 914 GENREs of PATHGENN.

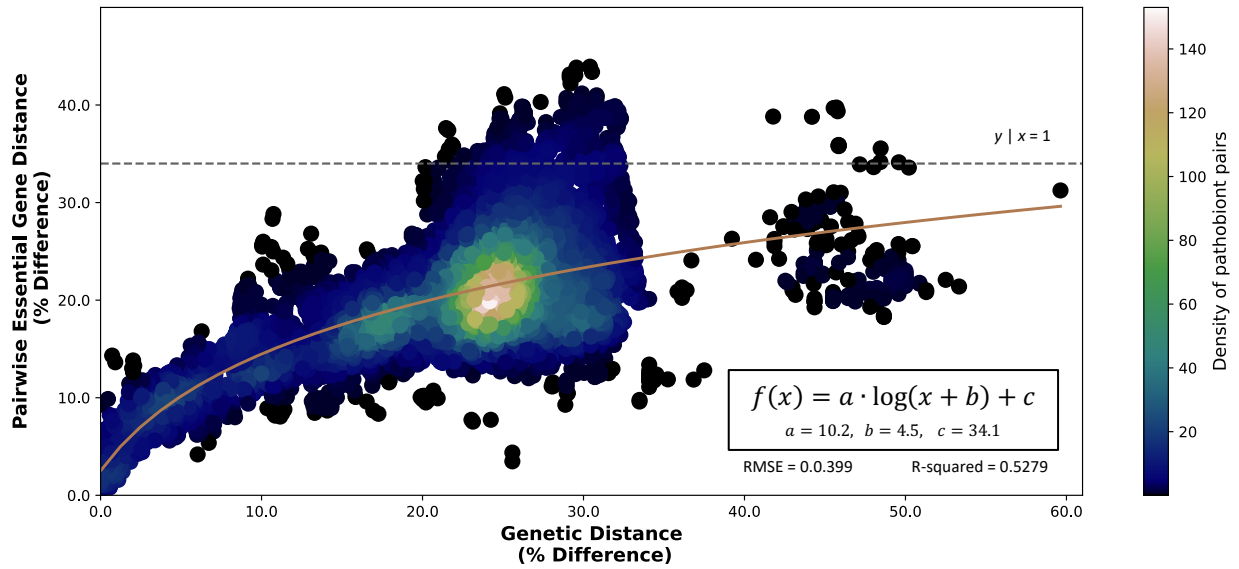

**S2 | Reaction differences in pathobiont pairs are related to their genetic distance.** The relationship between pairwise reaction presence profile distance and genetic distance of 245 pathobionts can be approximated with log functions.



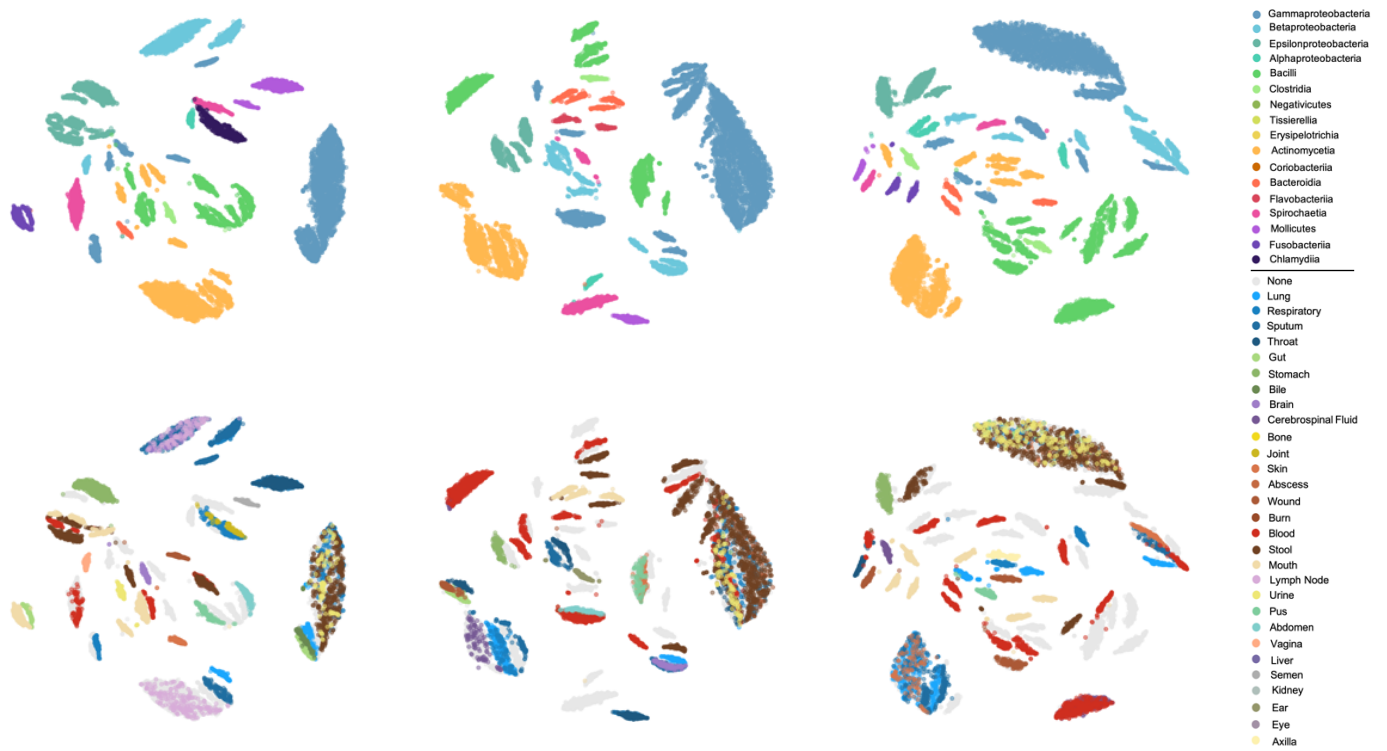

**S3 | t-SNE plot of 100 flux samples for 100 GENRES.** The clustering relationships seen in Figure 4 with 10 flux samples for each of 914 models are consistent with the clusters seen here with three randomly selected subsets of 100 GENRES with 100 flux samples each.
